# Supplementary material for: Potent MERS-CoV Fusion Inhibitory Peptides Identified from HR2 Domain in Spike Protein of Bat Coronavirus HKU4
Source: MDPI journal article supplement (doi:10.3390/v11010056), 2019-01-14
Supplement: s1 [file s1]

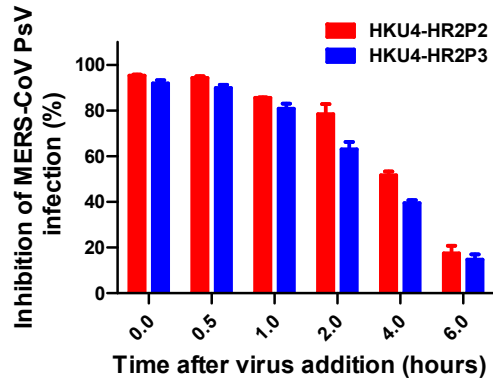

**Figure S1.** Inhibition of HKU4-HR2P2 and HKU4-HR2P3 on pseudotyped MERS-CoV infection at various intervals post-infection.

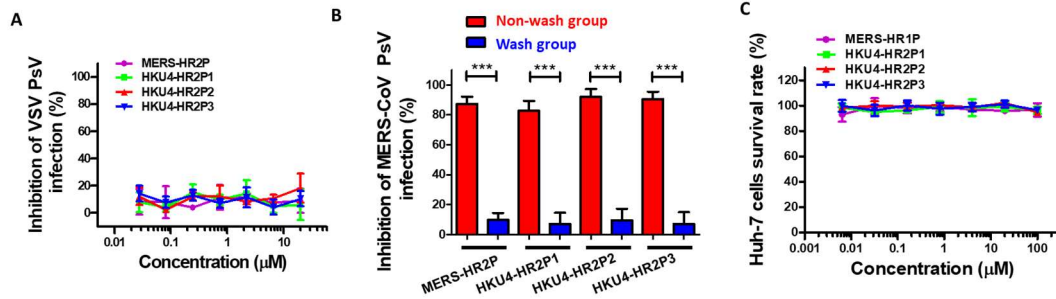

**Figure S2.** The antiviral specificity of the HKU4-HR2 peptides. (A) VSV-G pseudovirus infection assay. HKU4-HR2 peptides had no inhibitory activity against VSV-G pseudovirus infection as well as MERS-HR2P. (B) Time-of-removal assay. The antiviral activity of HKU4-HR2 peptides is not because of their interaction with the target cells (Huh-7). \*\*\* represents  $p < 0.001$ . (C) Cytotoxicity assay. The antiviral activity of HKU4-HR2 peptides is not because of their cytotoxicity to the target cells (Huh-7).
